# Supplementary material for: Associations of Socio-Demographic, Clinical and Biochemical Parameters with Healthcare Cost, Health- and Renal-Related Quality of Life in Hemodialysis Patients: A Clinical Observational Study
Source: PubMed Central journal article supplement (PMC7559218; doi:10.3390/ijerph17186552), 2020-09-09
Supplement: ijerph-17-06552-s001.pdf [file ijerph-17-06552-s001.pdf]

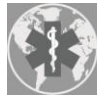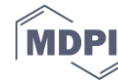

**Table 1.** Spearman’s correlation among independent variables ( $N = 160$ ).

|                | Age   | Gender      | Marital status | Education | Residence area | Occupation  | Income | BMI         | WC    | HD vintage | CCI   | SBP   | DBP   | Hgb         | Alb         | Cre         | Pre-BUN | RBC         | Hct  | WBC  | TP   |  |
|----------------|-------|-------------|----------------|-----------|----------------|-------------|--------|-------------|-------|------------|-------|-------|-------|-------------|-------------|-------------|---------|-------------|------|------|------|--|
| Age            | 1.00  |             |                |           |                |             |        |             |       |            |       |       |       |             |             |             |         |             |      |      |      |  |
| Gender         | 0.05  | 1.00        |                |           |                |             |        |             |       |            |       |       |       |             |             |             |         |             |      |      |      |  |
| Marital status | 0.20  | 0.09        | 1.00           |           |                |             |        |             |       |            |       |       |       |             |             |             |         |             |      |      |      |  |
| Education      | -0.22 | 0.11        | -0.17          | 1.00      |                |             |        |             |       |            |       |       |       |             |             |             |         |             |      |      |      |  |
| Residence area | 0.03  | -0.11       | -0.04          | 0.20      | 1.00           |             |        |             |       |            |       |       |       |             |             |             |         |             |      |      |      |  |
| Occupation     | -0.06 | 0.00        | 0.05           | 0.30      | 0.10           | 1.00        |        |             |       |            |       |       |       |             |             |             |         |             |      |      |      |  |
| Income         | 0.09  | 0.07        | 0.09           | 0.30      | 0.12           | <b>0.45</b> | 1.00   |             |       |            |       |       |       |             |             |             |         |             |      |      |      |  |
| BMI            | 0.06  | 0.04        | -0.03          | 0.22      | 0.21           | 0.15        | 0.14   | 1.00        |       |            |       |       |       |             |             |             |         |             |      |      |      |  |
| WC             | 0.08  | -0.37       | -0.04          | 0.04      | 0.27           | 0.08        | 0.13   | <b>0.33</b> | 1.00  |            |       |       |       |             |             |             |         |             |      |      |      |  |
| HD vintage     | -0.09 | 0.05        | -0.04          | 0.16      | -0.04          | 0.06        | -0.02  | -0.05       | 0.02  | 1.00       |       |       |       |             |             |             |         |             |      |      |      |  |
| CCI            | 0.16  | 0.07        | 0.03           | -0.02     | 0.09           | -0.10       | 0.09   | -0.10       | -0.06 | -0.01      | 1.00  |       |       |             |             |             |         |             |      |      |      |  |
| SBP            | -0.04 | 0.03        | 0.05           | -0.05     | -0.07          | -0.03       | -0.02  | -0.01       | 0.02  | 0.02       | 0.04  | 1.00  |       |             |             |             |         |             |      |      |      |  |
| DBP            | -0.05 | 0.09        | 0.05           | 0.08      | 0.02           | 0.05        | 0.06   | 0.08        | -0.08 | 0.03       | 0.06  | 0.24  | 1.00  |             |             |             |         |             |      |      |      |  |
| Hgb            | 0.14  | 0.14        | 0.10           | 0.09      | 0.00           | -0.09       | 0.02   | 0.12        | 0.12  | 0.21       | -0.18 | -0.13 | -0.09 | 1.00        |             |             |         |             |      |      |      |  |
| Alb            | -0.11 | 0.16        | 0.07           | 0.15      | -0.07          | 0.14        | 0.01   | 0.09        | -0.07 | -0.03      | -0.22 | 0.07  | 0.06  | 0.26        | 1.00        |             |         |             |      |      |      |  |
| Cre            | -0.17 | <b>0.33</b> | 0.03           | 0.14      | -0.02          | 0.02        | -0.01  | 0.15        | 0.02  | -0.12      | -0.22 | 0.15  | 0.06  | 0.06        | <b>0.43</b> | 1.00        |         |             |      |      |      |  |
| Pre-BUN        | 0.09  | 0.03        | 0.08           | -0.01     | 0.06           | 0.04        | -0.16  | 0.08        | -0.02 | -0.20      | -0.03 | 0.04  | 0.02  | -0.18       | 0.15        | <b>0.42</b> | 1.00    |             |      |      |      |  |
| RBC            | 0.04  | 0.08        | 0.05           | 0.02      | -0.11          | -0.11       | -0.04  | 0.04        | 0.06  | 0.06       | -0.25 | -0.16 | -0.10 | <b>0.79</b> | 0.29        | 0.13        | -0.16   | 1.00        |      |      |      |  |
| Hct            | 0.14  | 0.09        | 0.08           | 0.08      | -0.02          | -0.12       | -0.01  | 0.12        | 0.11  | 0.19       | -0.20 | -0.14 | -0.10 | <b>0.95</b> | 0.23        | 0.04        | -0.20   | <b>0.87</b> | 1.00 |      |      |  |
| WBC            | 0.05  | 0.04        | 0.11           | -0.11     | 0.00           | -0.07       | -0.01  | 0.10        | 0.11  | -0.09      | -0.02 | -0.04 | 0.19  | 0.12        | 0.15        | 0.21        | -0.05   | 0.14        | 0.10 | 1.00 |      |  |
| TP             | -0.02 | -0.01       | 0.02           | -0.05     | -0.07          | 0.11        | 0.02   | 0.05        | 0.01  | 0.01       | -0.08 | -0.01 | 0.08  | 0.21        | <b>0.41</b> | 0.10        | 0.01    | 0.21        | 0.19 | 0.19 | 1.00 |  |

Abbreviations: BMI, body mass index; WC, waist circumference; HD, hemodialysis; CCI, Charlson comorbidity index; SBP, systolic blood pressure; DBP, diastolic blood pressure; Hgb, hemoglobin; Alb, albumin; Cre, creatinine; pre-BUN, pre-dialysis blood urea nitrogen; RBC, red blood cell; Hct, hematocrit; WBC, white blood cell; TP, total protein.
